# Supplementary material for: SAM homeostasis is regulated by CFIm-mediated splicing of MAT2A
Source: eLife. 2021 May 5;10:e64930. doi: 10.7554/eLife.64930 (PMC8139829; doi:10.7554/eLife.64930)
Supplement: Supplementary file 3. — DNA oligonucleotide sequences for cloning primers, northern blotting probe primers, RNase H oligonucleotides, CRISPR screen primers, and synthesized DNA for cloning. RNA oligonucleotides sequences for label transfer assay substrates. [file elife-64930-supp3.xlsx]

## Sheet: Table S3
Supplementary File 3. Nucleic acid reagents
primer	Sequence	Purpose
CFIm25 cloning
NC3604	tAAGCTTggatccATGTCTGTGGTACCGCCCAA	Forward CFIm25 primer. Used to amplify any CFIm25.
NC3752	tctagactcgagtcgaTCAGTTGTAAATAAAATTGAACCTG	Reverse CFIm25 primer. Used to amplify any CFIm25.
NC3597	GCAGGAATAGCTGGAGCCTGAGGAGGTTCAAA	Reverse#1 SOEing primer. Pair with NC3604 for first half of CFIm25-m1 (Y158A/Y160A).
NC3596	CAGGCTCCAGCTATTCCTGCACATATTACAAAGCC	Forward#2 SOEing primer. Pair with NC3752 for second half of CFIm25-m1(Y158A/Y160A).
NC3599	GCTCAATCTCTGAGGGAGACTAGAAATGATGGGTCC	Reverse#1 SOEing primer. Pair with NC3604 for first half of CFIm25-m2 (L218R).
NC3598	CTAGTCTCCCTCAGAGATTGAGCAGGTTCAATTTTATTTAC	Forward#2 SOEing primer. Pair with NC3752 for second half of CFIm25-m2 (L218R).
NC3601	TCATGCGCTGAAAACTGGCTGCAACAGAGCTGTCC	Reverse#1 SOEing primer. Pair with NC3604 for first half of CFIm25-m3 (R63S).
NC3600	CTCTGTTGCAGCCAGTTTTCAGCGCATGAGGGAAGA	Forward#2 SOEing primer. Pair with NC3752 for second half of CFIm25-m3 (R63S).
CFIm68 cloning
NC3753	TGACAAgaagcttggatccCGCATGGCGGACGGCGTGGACCA	Forward#1 CFIm68 SOEing. Pair with NC3839 for first half.
NC3839	TGGTCCCTCTCTCTTGATCG	Reverse#1 CFIm68 SOEing. Pair with NC3753 for first half.
NC3838	GCCAGTGCTGGTGATTATGG	Forward#2 CFIm68 SOEing. Pair with NC3754 for second half.
NC3754	tctagactcgagtcgaCTAACGATGACGATATTCGCGCTC	Reverse#2 CFIm68 SOEing. Pair with NC3838 for second half.
NC3888	ctagactcgagtcgaCTATGATCCAGAACCATAAGACTTGGACTC	Reverse CFIm68 delta RS domain. Pair with NC3753.
CFIm59 cloning
NC3755	AgaagcttggatccATGTCAGAAGGAGTGGACTTGA	Forward#1 CFIm59 SOEing. Pair with NC3841 for first half.
NC3841	ACTGGCCATTTGCTCGATTC	Reverse#1 CFIm59 SOEing. Pair with NC3755 for first half.
NC3840	ACAGTGGCCTGCGTAATAGA	Forward#2 CFIm59 SOEing. Pair with NC3756 for second half.
NC3756	tctagactcgagtcgaTCAGTGGTGCCGGTCCCGT	Reverse#2 CFIm59 SOEing. Pair with NC3840 for second half.
NC3889	ctagactcgagtcgaTCAGGAAGAGCTCCCACTGGCAC	Reverse CFIm59 delta RS domain. Pair with NC3755.
CRISPR gRNA cloning
NC2533	CACCGCTTCCACGAGGCGTTCATCG	sense CRISPR sgRNA-MAT2A. Used in Figure 1.
NC2534	AAACCGATGAACGCCTCGTGGAAGC	antisense CRISPR sgRNA-MAT2A. Used in Figure 1.
NC2978	caccgAAGAATTTCGATCTCCGCCC	Top-CRISPR sgRNA-MAT2A exon8 upstream of RI (pX458/9). Used to generate the 116-ΔDI cell line.
NC2979	aaacGGGCGGAGATCGAAATTCTTc	bottom-CRISPR sgrna-MAT2A exon 8 upstream of RI (pX458/9). Used to generate the 116-ΔDI cell line.
NC2980	caccgACTTGTATATTCCAGGGATC	Top-CRISPR sgRNA-MAT2A exon 9 downstream of RI (pX458/9). Used to generate the 116-ΔDI cell line.
NC2981	aaacGATCCCTGGAATATACAAGTc	bottom-CRISPR sgrna-MAT2A exon 9 downstream of RI (pX458/9). Used to generate the 116-ΔDI cell line.
NC3198	caccgTGTTCTACTTTCGAAGTTAA	Sense CRISPR sgRNA-Nontargeting
NC3199	aaacTTAACTTCGAAAGTAGAACAc	Antisense CRISPR sgRNA-Nontargeting
MAT2AΔDI donor plasmid cloning
NC2984	CGACCTGCGGCCTGGGGTCATTGTCAGGGATCTGGATCTGAAGAAGC	For-RHA donor plasmid ΔDI MAT2A (sgRNA muts and Gibson assembly overhang)
NC2985	GGCTAGgcggccgcGACAGCTGAAAGTGGAGAGA	Rev-RHA donor plasmid ΔDI MAT2A (NotI)
NC2982	AACTCGAggatccAGCAGTTGTGCCTGCGAAAT	For-LHA-Donor ΔDI MAT2A (BamHI)
NC2983	CTGACAATGACCCCAGGCCGCAGGTCGAAATTTTTCTTCACAATCTC	Rev-LHA-donor plasmid ΔDI MAT2A (sgRNA mutations)
NC1145	ACCTACgaattcGTCTCTTATGCTATTGGAGTTTC	Forward - MAT2A PCR for detained intron deletion
NC2537	gccctttccctcagagcttgaaggcttctctCtagcctacgccaacaagtctggggaaaaaaggc	Reverse - MAT2A PCR for detained intron deletion
pEGFP plasmid cloning
NC3272	gactcactatagggagacccATGGTGAGCAAGGGCGAG	For making pEGFP-Cterm. FWD prime for GFP to be used in Gibson
NC3273	tggatccgagctcggtaccaagcttGCCTTGTACAGCTCGTCC	For making pEGFP-Cterm. REV prime for GFP to be used in Gibson
Generation of pE-SUMO-CFIm25
NC3852	tccaatGAAGACacAGGTatgTCTGTGGTACCGCCCAA	Forward for making pE-SUMO-CFIm25
NC3853	GATCTAGATTAactGTTGTAAATAAAATTGAACCTGCTC	Reverse for making pE-SUMO-CFIm25
pcGFP donor plasmids for reporter lines
NC2229	actcactatagggagacccaaccATGGTGAGCAAGGGCGA	FOR for Gibson cloning GFP-b1-MAT-E8-3´ (EGFP)
NC2230	cCCTGAAGTTCTCAGGATCCacCTTGTACAGCTCGTCCATG	REV for Gibson cloning GFP-b1-MAT-E8-3´ (EGFP)
NC2231	CATGGACGAGCTGTACAAGgtGGATCCTGAGAACTTCAGGg	FOR for Gibson cloning GFP-b1-MAT-E8-3´ (b1-MAT)
NC2232	GGCTAACACTTTCAATATTTAAGCTTTTTGGGCACTTCCCATGGGA	REV for Gibson cloning GFP-b1-MAT-E8-3´ (b1-MAT)
NC2264	cagtggggcaagctGGCCGGtcgcgatgtacgggccagat	FOR-for Gibson cloning GFP-MAT2A-e8-3´ into pAAVS1-HYG
NC2265	ATGTGGTATGGCTGATTATGATagatcttcattaaactgttgg	REV-for Gibson cloning GFP-MAT2A-e8-3´ into pAAVS1-HYG
NC3354	actctcggcatggacgagctgtacaagGCAGGTTCAGGGGAGGGCAGAGGAAGTCTTC	Gibson for p2A MAT2A-GFP construct. Backbone-p2A FWD
NC3375	catagactcacCCTGAAGTTCTCAGGATCCacAGGGCCGGGATTCTCCTCC	Gibson for GFP-P2A-b1-MAT8-3'. REV P2A - to connect b-glob
NC3463	tgacgtggaggagaatcccggccctgtggatcctgagaacttc	Gibson for GFP-T2A-Bglob-MAT8+9+3': FW B glob to connect T2A
NC3466	ACTAGTGGATCCGAGCTCGGTACCAGGCCCTCGAGATAGCGGC	Gibson for GFP-T2A-Bglob-MAT8+9+3': RV 3'UTR to connect pEGFP
β-MAT reporter construct variants cloning
NC3287	Tttaaaattacggtgctccatgg	Forward#1 β-MAT-UGUU>UGCU first fragment. To be used with NC3288
NC3288	AGTCTGGGGAAAAAAGGCTAgCACTTTCAATATTTAAGCTT	Reverse#1 β-MAT-UGUU>UGCU first fragment. To be used with NC3287
NC3289	AAGCTTAAATATTGAAAGTGcTAGCCTTTTTTCCCCAGACT	Forward#2 β-MAT-UGUU>UGCU second fragment. To be used with NC3290
NC3290	ACTTCTCTGTATGACATCACAAG	Reverse#2 β-MAT-UGUU>UGCU second fragment. To be used with NC3289
NC3346	gacactatagaatagggccctcgagATAGCGGCCGCCTTGGTAC	Flanking Reverse primer (on XhoI side). Paired with internal primers to make fragment 2s of MAT2A DI mutations.
NC3339	ggcccatcactttggcaaagaattcGTCTCTTATGCTATTGGAGTTTCTC	Flanking Forward primer (on EcoRI side). Paired with internal primers to make fragment 1s of MAT2A DI mutations.
NC3878	tacggacttgcatattccagGGATCTGGATC	Forward for MAT2A DI UGUA to UGCA fragment 2. Pair with NC3346.
NC3879	CCAGATCCctggaatatgcaagtccgtaacttaatatg	Reverse for MAT2A DI UGUA to UGCA fragment 1. Pair with NC3339.
NC3880	tacggactcgtatattccagGGATCTGGATC	Forward for MAT2A DI UGUA to CGUA fragment 2. Pair with NC3346.
NC3881	CCAGATCCctggaatatacgagtccgtaacttaatatg	Reverse for MAT2A DI UGUA to CGUA fragment 1. Pair with NC3339.
NC2935	CTGGCCCATCACTTTGGCAAAG	Forward for MAT2A UGUU between stop and hp1 to UGUA fragment 1. To be used with NC1747.
NC1747	TCAATATTTAAGCTTTTTGGGCAC	Reverse for MAT2A UGUU between stop and hp1 to UGUA fragment 1. To be used with NC2935.
NC3700	CCCAAAAAGCTTAAATATTGAAAGTGTAAGCCTTTTTTCC	Forward for MAT2A UGUU between stop and hp1 to UGUA fragment 2. Pair with NC3346.
NC3667	GAAGCCTTCAAGCTCTGAGGG	Forward for amplifying synthesized gene fragments for MAT2A 3’UTR last motif and 10/11 constructs. Pair with NC3668.
NC3668	GCATTTAGGTGACACTATAGAATAGGGC	Reverse for amplifying synthesized gene fragments for MAT2A 3’UTR last motif and 10/11 constructs. Pair with NC3667.
NC1576	CTTATCTTCCTCCCACAGCT	Forward for hp1G4, 2XMS2 reporter construct fragment#1
NC2671	acatgggtgatcctcatgttttctacagtAgtccagcagacatgggtgatcctcatgtttGACAGGAAAATTTAGGAAGGAGG	Reverse for hp1G4, 2XMS2 reporter construct fragment#1
NC2670	aaacatgaggatcacccatgtctgctggacTactgtagaaaacatgaggatcacccatgtCTCTTTCAGCTCCTGACCAG	Reverse for hp1G4, 2XMS2 reporter construct fragment#2
SP6+	GCTCTAGCATTTAGGTGACACTATAG	Forward for hp1G4, 2XMS2 reporter construct fragment#2
Northern blotting probe primers
NC2909	ACCACATGAAGCAGCACGAC	Forward GFP northern blotting probe
NC2946	CGCGTAATACGACTCACTATAGGGcttgtacagctcgtccatgc	Reverse GFP northern blotting probe (contains T7)
NC2909	ACCACATGAAGCAGCACGAC	Forward GFP* northern blotting probe (optimized GFP northern blotting probe)
NC4001	TAATACGACTCACTATAGGGATCTTGAAGTTCACCTTGATG	Reverse GFP* northern blotting probe (contains T7; optimized GFP northern blotting probe)
NC1549	CCTGCCGTCTAGAAAAACCTG	Forward GAPDH northern blotting probe
NC1550	CGCGTAATACGACTCACTATAGGGGGTTGAGCACAGGGTACTTTA	Reverse GAPDH northern blotting probe
NC964	ATGAACGGACAGCTCAACGGC	Forward MAT2A northern blotting probe
NC965	TAATACGACTCACTATAGGGACTTGGCTGTAGGTGGTAGAT	Reverse MAT2A northern blotting probe
Label Transfer Assay Substrates (RNA synthesized by Sigma)
WT	5´-auugaaaguguuagccuuuuu-3´	Wild-type (UGUU) RNA used as substrate and competitor.
UGCU	5´-auugaaagugcuagccuuuuu-3´	UGCU RNA used as substrate and competitor.
UGUA	5´-auugaaaguguaagccuuuuu-3´	UGUA RNA used as substrate and competitor.
RNase H DNA Oligonucleotides
dT20	TTTTTTTTTTTTTTTTTTTT	dT20 primer (black) for MAT2A RNaseH mapping. Used in all RNaseH reactions.
NC1095	GCTCATTGGACCTGGTTTTG	Primer A (blue) for MAT2A RNaseH mapping
NC1125	gcggagatcgaaattcttct	Primer B (red) for MAT2A RNaseH mapping.
CRISPR Screen PCR Step 1 Primers
NC3196	tatcttgtggaaaggacga	Forward primer for PCR1 of CRISPR screen library prep
NC3197	gagccaattcccactcctttc	Reverse primer for PCR1 of CRISPR screen library prep
CRISPR Screen PCR Step 2 Primers
P5 stagger 0nt	AATGATACGGCGACCACCGAGATCTACACTCTTTCCCTACACGACGCTCTTCCGATCTTTGTGGAAAGGACGAAACACCG		P5 primer used to amplify CRISPR screen in PCR2. Combined the eight stagger primers in equal molar ratio before use.
P5 stagger 1nt	AATGATACGGCGACCACCGAGATCTACACTCTTTCCCTACACGACGCTCTTCCGATCTCTTGTGGAAAGGACGAAACACCG
P5 stagger 2nt	AATGATACGGCGACCACCGAGATCTACACTCTTTCCCTACACGACGCTCTTCCGATCTGCTTGTGGAAAGGACGAAACACCG
P5 stagger 3nt	AATGATACGGCGACCACCGAGATCTACACTCTTTCCCTACACGACGCTCTTCCGATCTAGCTTGTGGAAAGGACGAAACACCG
P5 stagger 4nt	AATGATACGGCGACCACCGAGATCTACACTCTTTCCCTACACGACGCTCTTCCGATCTCAACTTGTGGAAAGGACGAAACACCG
P5 stagger 6nt	AATGATACGGCGACCACCGAGATCTACACTCTTTCCCTACACGACGCTCTTCCGATCTTGCACCTTGTGGAAAGGACGAAACACCG
P5 stagger 7nt	AATGATACGGCGACCACCGAGATCTACACTCTTTCCCTACACGACGCTCTTCCGATCTACGCAACTTGTGGAAAGGACGAAACACCG
P5 stagger 8nt	AATGATACGGCGACCACCGAGATCTACACTCTTTCCCTACACGACGCTCTTCCGATCTGAAGACCCTTGTGGAAAGGACGAAACACCG
P7 sequence C01	CAAGCAGAAGACGGCATACGAGATGCACGACCGTGACTGGAGTTCAGACGTGTGCTCTTCCGATCTCCAATTCCCACTCCTTTCAAGACCT		P7 primer used to amplify CRISPR screen in PCR2. A unique P7 barcode primer was used for each CRISPR screen sample.
P7 sequence C02	CAAGCAGAAGACGGCATACGAGATTACACTCCGTGACTGGAGTTCAGACGTGTGCTCTTCCGATCTCCAATTCCCACTCCTTTCAAGACCT
P7 sequence C03	CAAGCAGAAGACGGCATACGAGATCGGTCTAAGTGACTGGAGTTCAGACGTGTGCTCTTCCGATCTCCAATTCCCACTCCTTTCAAGACCT
P7 sequence C04	CAAGCAGAAGACGGCATACGAGATATGTTCGGGTGACTGGAGTTCAGACGTGTGCTCTTCCGATCTCCAATTCCCACTCCTTTCAAGACCT
P7 sequence C05	CAAGCAGAAGACGGCATACGAGATCGTGGACCGTGACTGGAGTTCAGACGTGTGCTCTTCCGATCTCCAATTCCCACTCCTTTCAAGACCT
P7 sequence C06	CAAGCAGAAGACGGCATACGAGATATTGAGCCGTGACTGGAGTTCAGACGTGTGCTCTTCCGATCTCCAATTCCCACTCCTTTCAAGACCT
P7 sequence C07	CAAGCAGAAGACGGCATACGAGATTAGTTCGGGTGACTGGAGTTCAGACGTGTGCTCTTCCGATCTCCAATTCCCACTCCTTTCAAGACCT
P7 sequence C08	CAAGCAGAAGACGGCATACGAGATCGGTGAGGGTGACTGGAGTTCAGACGTGTGCTCTTCCGATCTCCAATTCCCACTCCTTTCAAGACCT
P7 sequence C09	CAAGCAGAAGACGGCATACGAGATCGTGAGTTGTGACTGGAGTTCAGACGTGTGCTCTTCCGATCTCCAATTCCCACTCCTTTCAAGACCT
P7 sequence C10	CAAGCAGAAGACGGCATACGAGATATCAGATTGTGACTGGAGTTCAGACGTGTGCTCTTCCGATCTCCAATTCCCACTCCTTTCAAGACCT
Synthesized DNA for cloning (Synthesized by GeneWiz)
β-MAT-3´UTR-Last-Motif-UGCA	GAAGCCTTCAAGCTCTGAGGGAAAGGGCCCTCCTTCCTAAATTTTCCTGTCCTCTTTCAGCTCCTGACCAGTTGCAGTCACTCTAGTCAATGACATGAATTTTAGCTTTTGTGGGGGACCGTAAGTTGGGCTTGCTATTCTGTCCCTAGGTGTTTTGTTCACCATTATAATGAATTTAGTGAGCATAGGTGATCCATCTAACTGCCTAGAAACAACACTGCAGTAAATAATGCTTTGAAATTGAACCTTTGTGCCCTATCACCCAACGCTCCAAAGTCATAATTGCATTGACTTTCCCCACCAGATGCTGAAAATGTCCTTGTGATGTGCACGTAAAGTACTCGTAGTTCCACTTATAGCCTCTGTCTGGCAATGCCACAGCCCTGTCAGCATGAATTT…
β-MAT-3´UTR-10/11	GAAGCCTTCAAGCTCTGAGGGAAAGGGCCCTCCTTCCTAAATTTTCCTGTCCTCTTTCAGCTCCTGACCAGTTGCAGTCACTCTAGTCAATGACATGAATTTTAGCTTTTGTGGGGGACTGTAAGTTGGGCTTGCTATTCTGTCCCTAGGTGTTTTGTTCACCATTATAATGAATTTAGTGAGCATAGGTGATCCATGTAACTGCCTAGAAACAACACTGTAGTAAATAATGCTTTGAAATTGAACCTTTGTGCCCTATCACCCAACGCTCCAAAGTCATAATTGCATTGACTTTCCCCACCAGATGCTGAAAATGTCCTTGTGATGTGCACGTAAAGTACTTGTAGTTCCACTTATAGCCTCTGTCTGGCAATGCCACAGCCCTGTCAGCATGAATTT…
