# Supplementary figures and images for: SAM homeostasis is regulated by CFIm-mediated splicing of MAT2A
Source: eLife journal article supplement (doi:10.7554/elife.64930), 2021-05-05

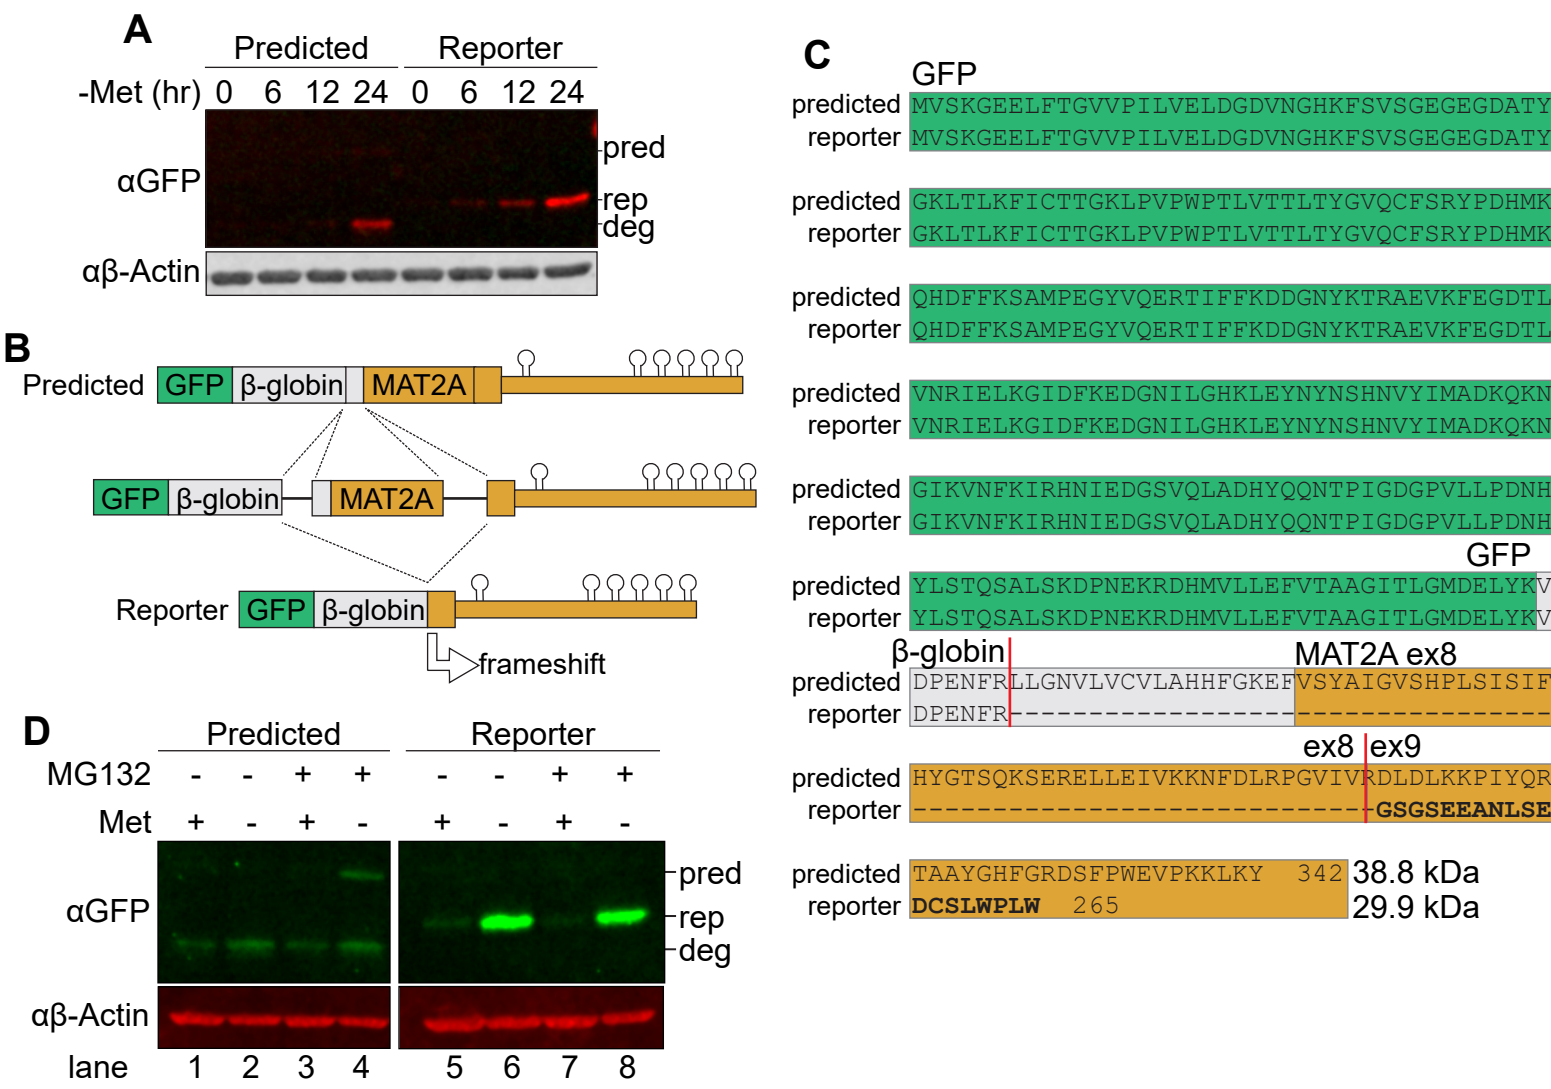

Figure 1-figure supplement 1

Supplement: supp [file elife_poa_e64930_Figure_1_figure_supplement_1.pdf › elife_poa_e64930_Figure_1_figure_supplement_1.pdf]

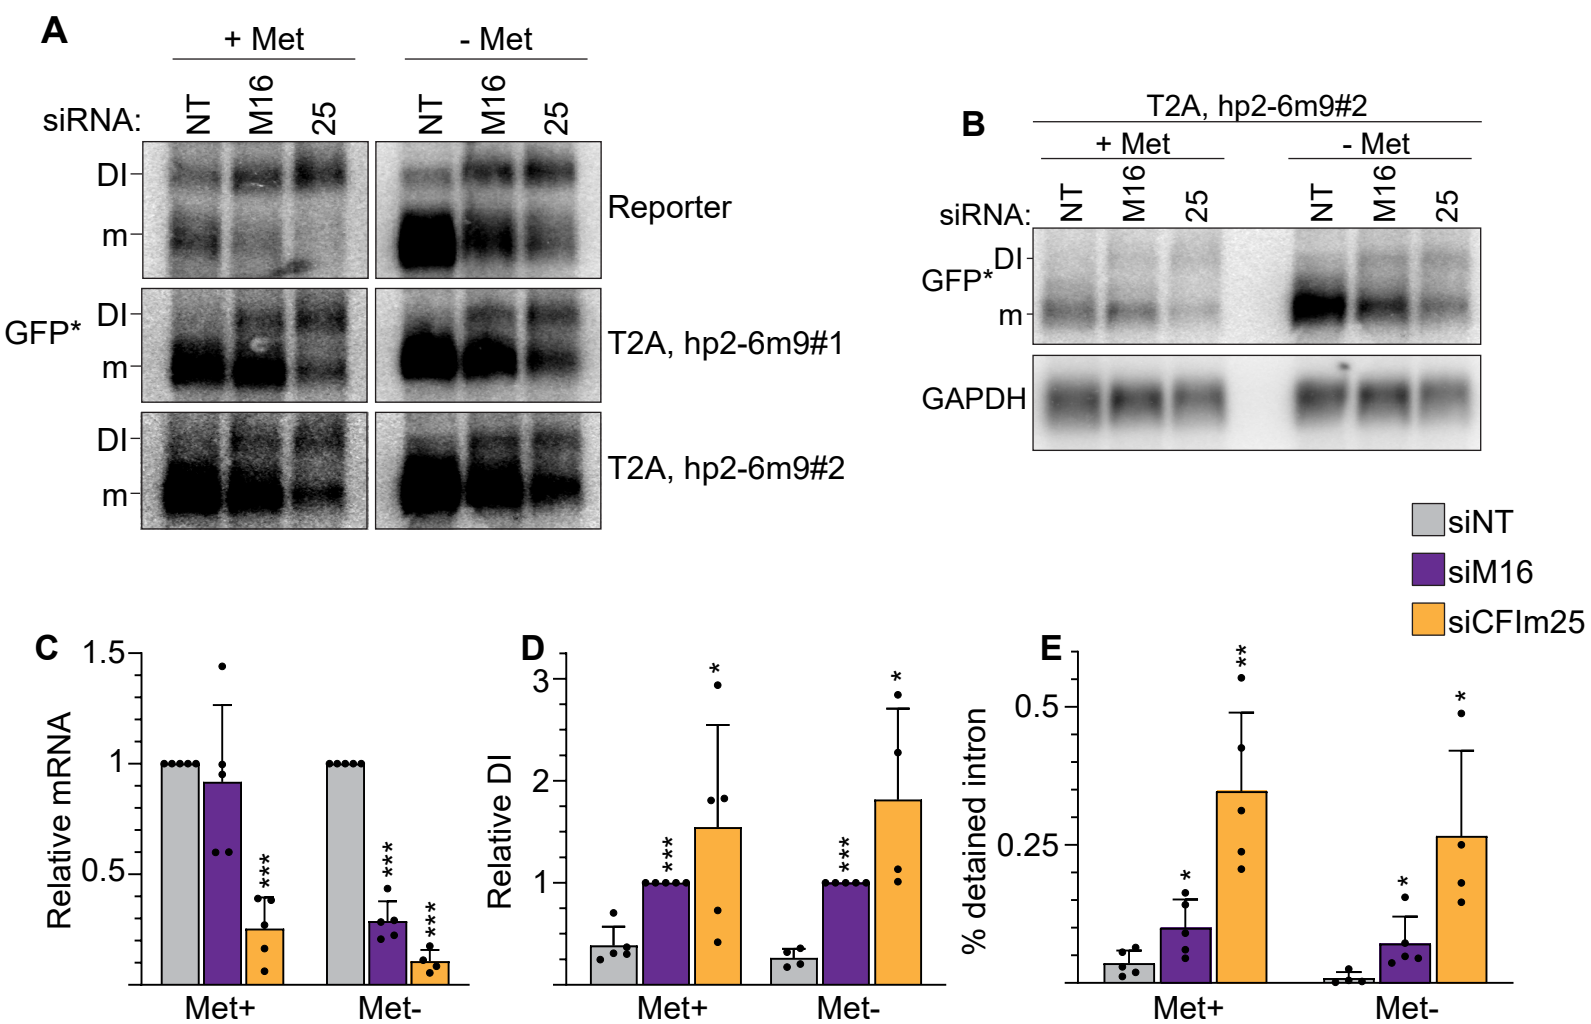

Figure 2-figure supplement 1

Supplement: supp [file elife_poa_e64930_Figure_2_figure_supplement_1.pdf › elife_poa_e64930_Figure_2_figure_supplement_1.pdf]

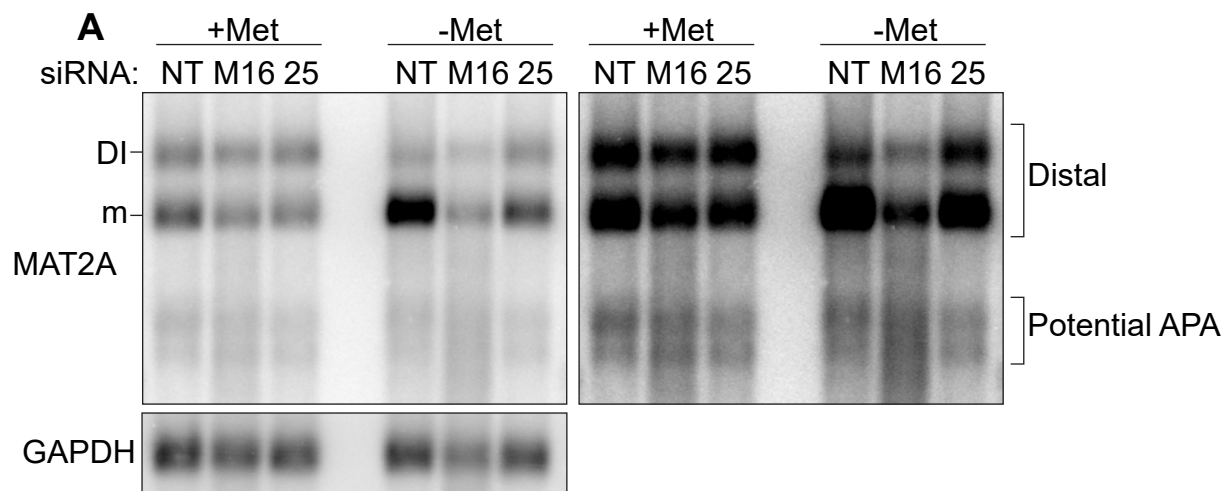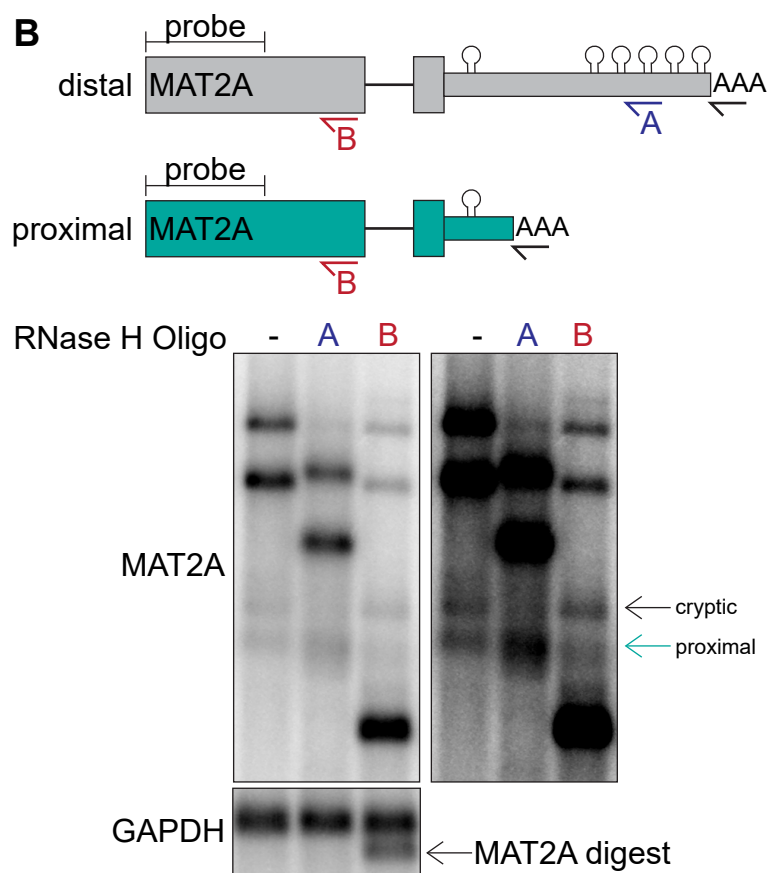

Figure 2-figure supplement 2

Supplement: supp [file elife_poa_e64930_Figure_2_figure_supplement_2.pdf › elife_poa_e64930_Figure_2_figure_supplement_2.pdf]

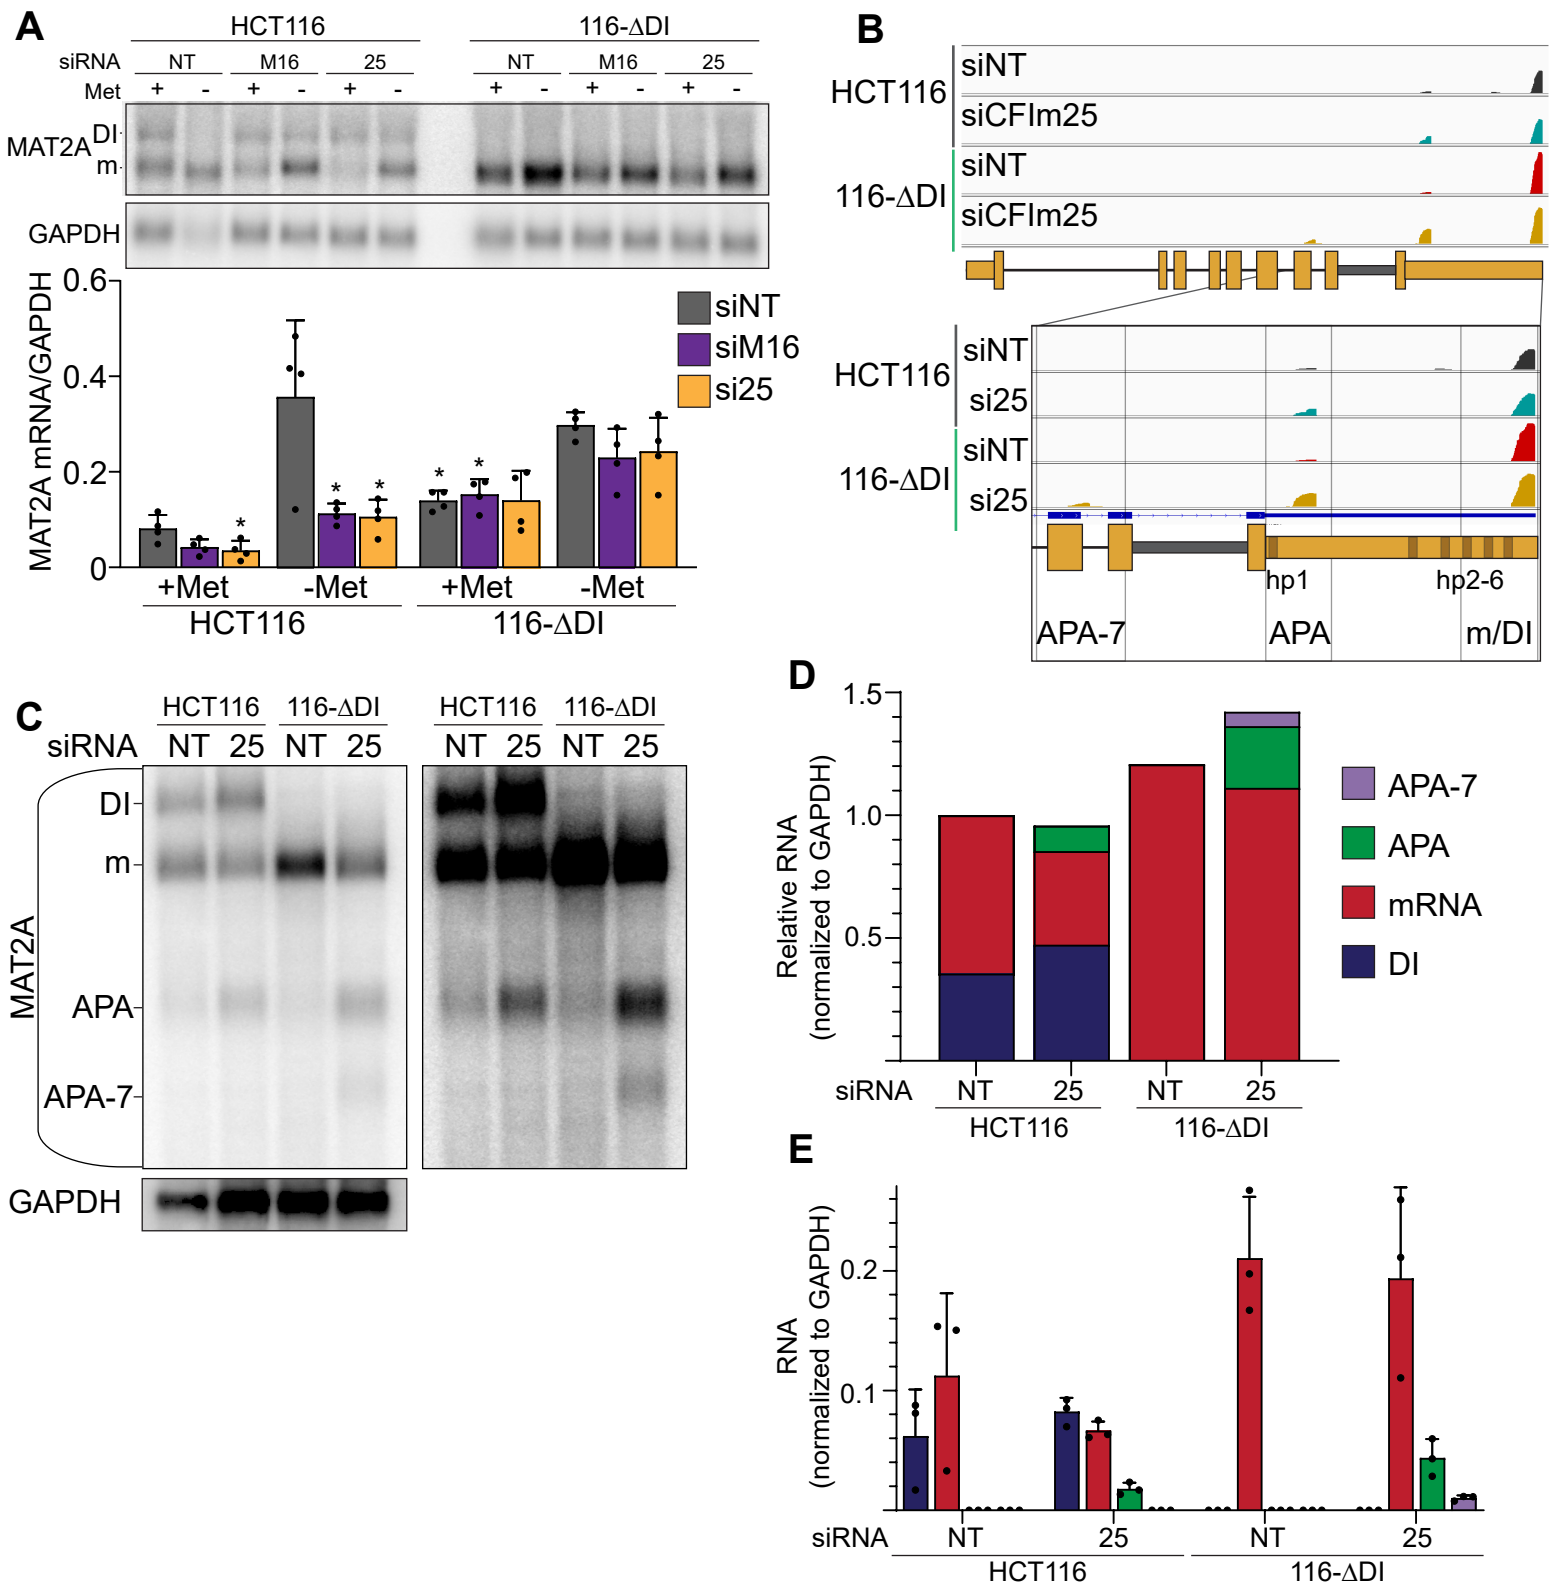

Figure 3-figure supplement 1

Supplement: supp [file elife_poa_e64930_Figure_3_figure_supplement_1.pdf › elife_poa_e64930_Figure_3_figure_supplement_1.pdf]

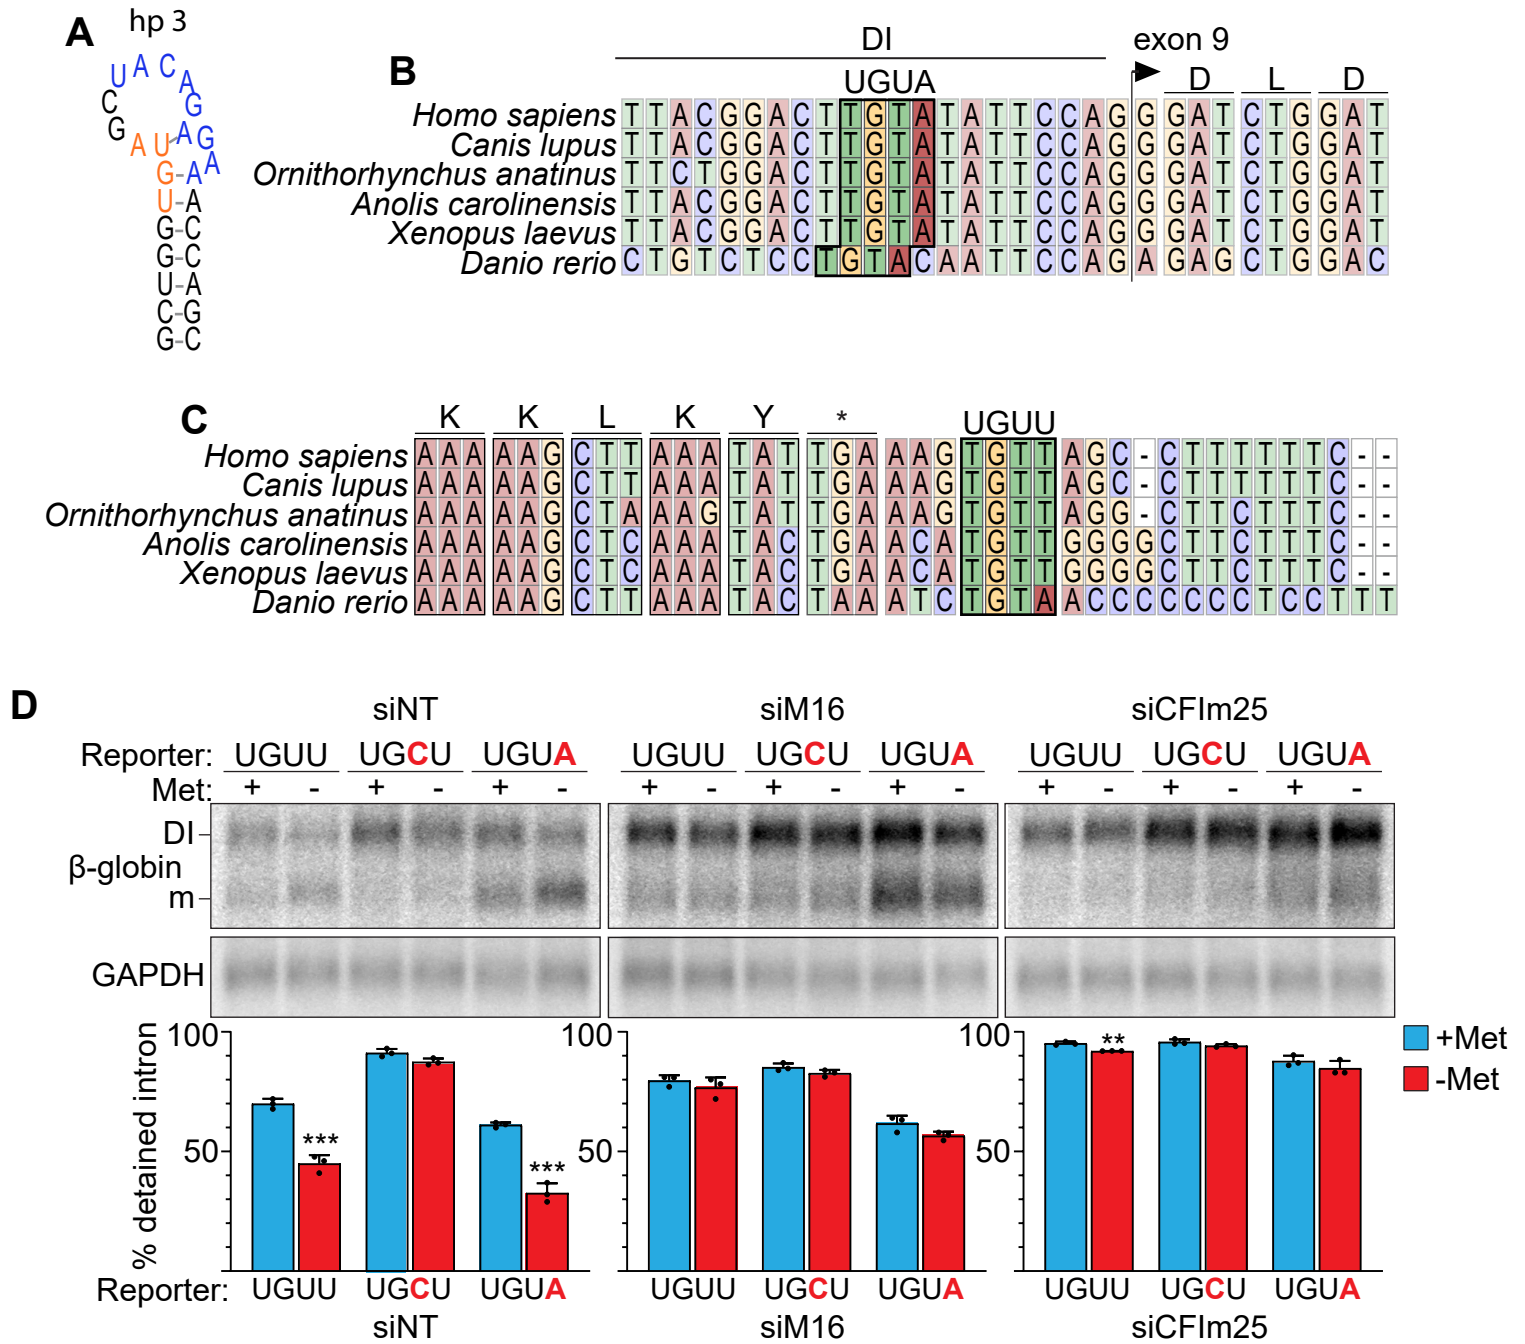

Figure 4-figure supplement 1

Supplement: supp [file elife_poa_e64930_Figure_4_figure_supplement_1.pdf › elife_poa_e64930_Figure_4_figure_supplement_1.pdf]

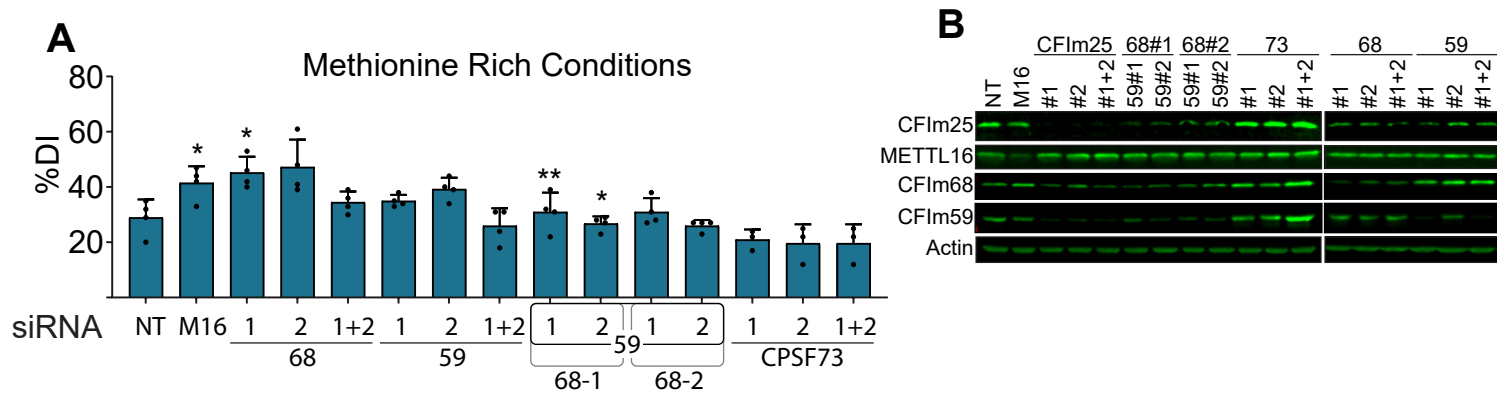

Figure 5-figure supplement 1

Supplement: supp [file elife_poa_e64930_Figure_5_figure_supplement_1.pdf › elife_poa_e64930_Figure_5_figure_supplement_1.pdf]

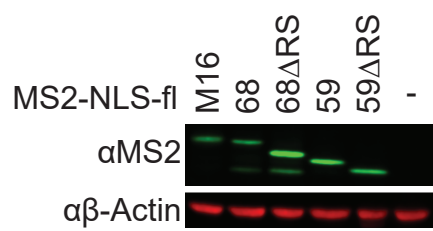

Figure 6-figure supplement 1

Supplement: supp [file elife_poa_e64930_Figure_6_figure_supplement_1.pdf › elife_poa_e64930_Figure_6_figure_supplement_1.pdf]

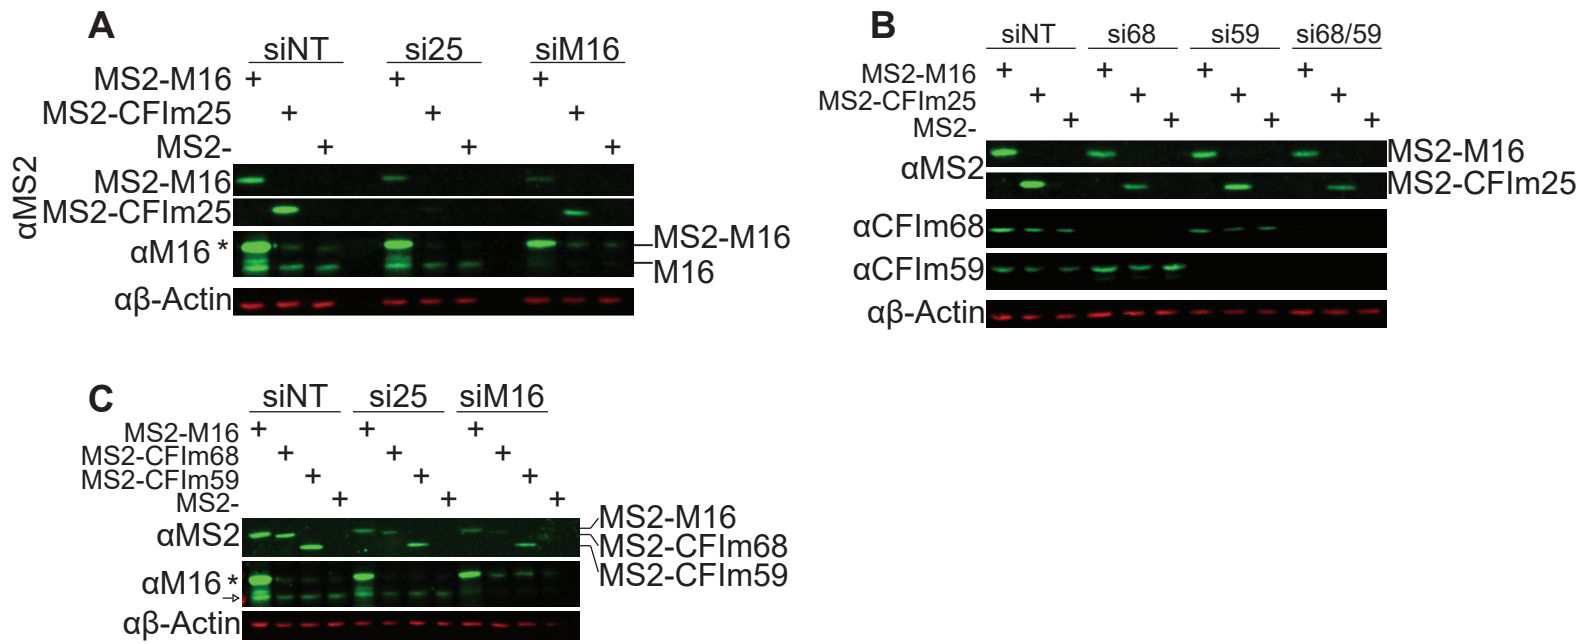

Figure 7-figure supplement 1

Supplement: supp [file elife_poa_e64930_Figure_7_figure_supplement_1.pdf › elife_poa_e64930_Figure_7_figure_supplement_1.pdf]
